# Supplementary material for: Review: MMF spinning, yarn twisting and winding machines
Source: Springer Nature journal article supplement (doi:10.1186/s13054-022-04064-3), 2010-08-01
Supplement: MOESM1 [file 23210874]

## Supplementary Appendix

Supplement to: Ibarra-Estrada M, Gamero-Rodríguez M, García-de-Acilu M, et al. Lung Ultrasound

Response to Awake Prone Positioning Predicts Intubation in COVID-19.

### Table of contents:

|                                                                                                                                                                                                                                                                                                        |         |
|--------------------------------------------------------------------------------------------------------------------------------------------------------------------------------------------------------------------------------------------------------------------------------------------------------|---------|
| <b>Table S1.</b> Values of LUS scores at the first APP session and at the 3 days of observation according to groups.                                                                                                                                                                                   | Page 2  |
| <b>Figure S1.</b> Responses in LUS score ( <b>a, b, c</b> ), SpO <sub>2</sub> :FiO <sub>2</sub> ratio ( <b>d, e, f</b> ), ROX index ( <b>g, h, i</b> ) and respiratory rate ( <b>j, k, l</b> ) at the APP sessions.                                                                                    | Page 3  |
| <b>Figure S2.</b> Response in global and dorsal LUS score after the first APP session.                                                                                                                                                                                                                 | Page 4  |
| <b>Figure S3.</b> Correlation of mean daily duration of APP of the first 3 days with response in overall LUS score ( <b>a</b> ), respiratory rate ( <b>b</b> ) SpO <sub>2</sub> :FiO <sub>2</sub> ratio ( <b>c</b> ), and ROX index ( <b>d</b> ).                                                      | Page 5  |
| <b>Figure S4.</b> Mean daily duration of APP at 3 days and LUS score changes in dorsal and ventral lung zones.                                                                                                                                                                                         | Page 6  |
| <b>Figure S5.</b> Responses in SpO <sub>2</sub> :FiO <sub>2</sub> ratio ( <b>a, b, c</b> ), ROX index ( <b>d, e, f</b> ), and respiratory rates at the first morning APP sessions of the 1 <sup>st</sup> , 2 <sup>nd</sup> and 3 <sup>rd</sup> days.                                                   | Page 7  |
| <b>Figure S6.</b> Correlation between response in LUS score with SpO <sub>2</sub> :FiO <sub>2</sub> ratio, ROX index and respiratory rate at the first morning APP sessions of the 1 <sup>st</sup> ( <b>a, b, c</b> ), 2 <sup>nd</sup> ( <b>d, e, f</b> ) and 3 <sup>rd</sup> ( <b>g, h, i</b> ) days. | Page 8  |
| <b>Figure S7.</b> Comparison between areas under the ROC curves of responses to APP at the first session.                                                                                                                                                                                              | Page 9  |
| <b>Table S2.</b> Logistic regression to analyze the effect of ≥1 point decrease in dorsal LUS score at the first APP on the risk of intubation.                                                                                                                                                        | Page 10 |

**Table S1.** Values of LUS scores at the first APP session and at the 3 days of observation according to groups

|                   | First APP session |            |            | Whole 3 days |
|-------------------|-------------------|------------|------------|--------------|
|                   | Pre-APP           | 1-h on APP | After APP  | Pre-APP      |
| Treatment success | 20 (19-24)        | 19 (18-21) | 19 (18-21) | 19 (18-20)   |
| Treatment failure | 20 (18-24)        | 20 (18-24) | 20 (19-23) | 22 (20-23)   |

**Figure S1.** Response in regional LUS score after the first APP sessions of days 2 and 3.

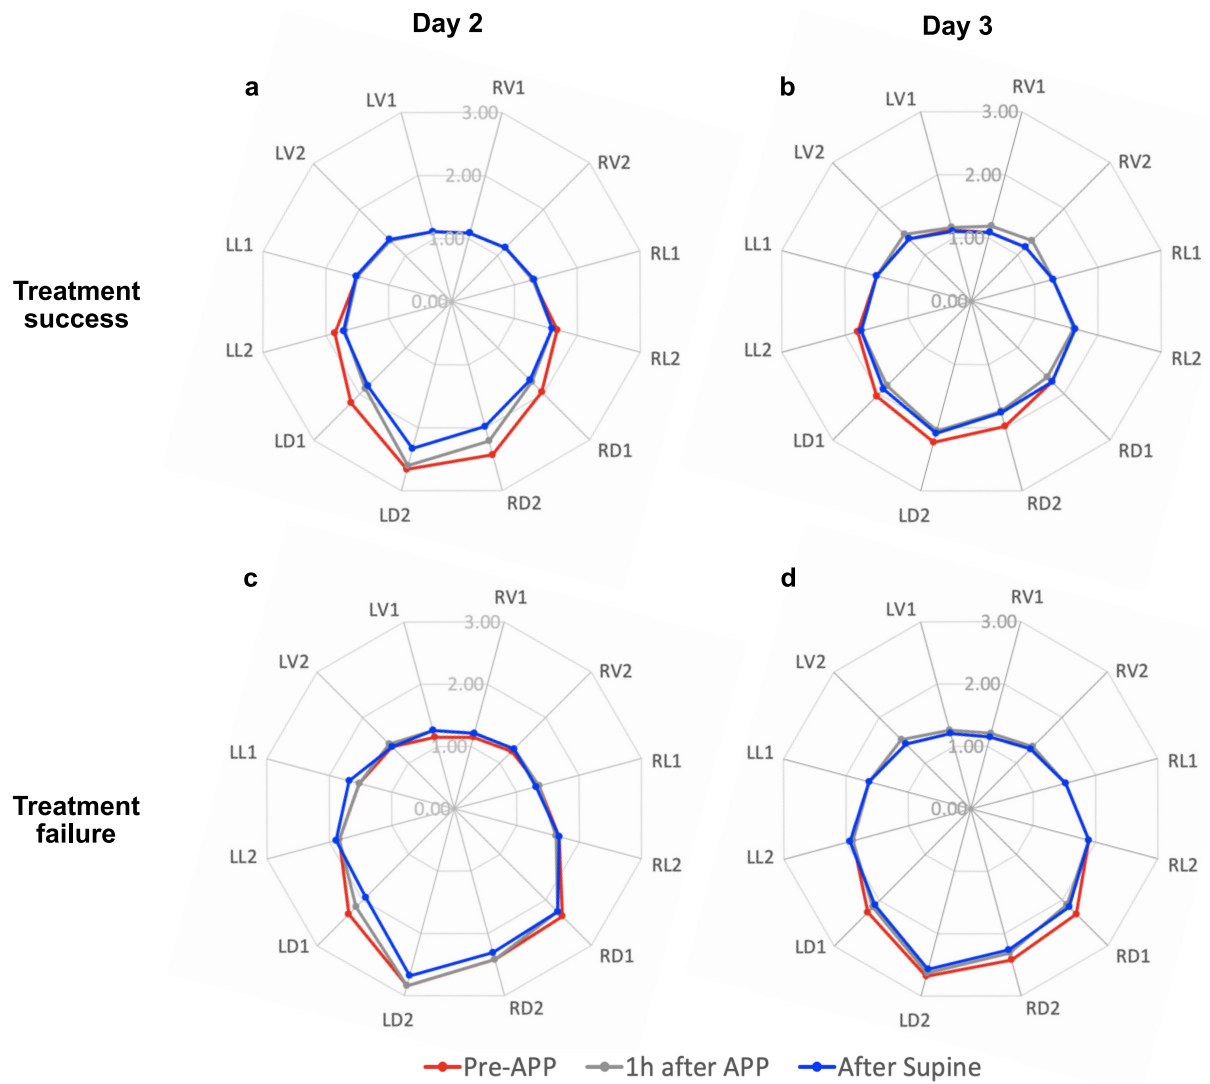

Patients with treatment success at days 2 (**a**) and 3 (**b**). Patients with treatment failure at days 2 (**c**) and 3 (**d**). RV, right ventral; RL, right lateral; RD, right dorsal; LV, left ventral; LL, left lateral; LD, left dorsal; LUS, lung ultrasound score; APP, awake prone positioning.

**Figure S2.** Response in global and dorsal LUS score after the first APP session. Between subject  $P=0.07$  for global score and  $P=0.02$  for dorsal score. LUS, lung ultrasound; APP, awake prone positioning. \* $P<0.05$ , compared to responders.

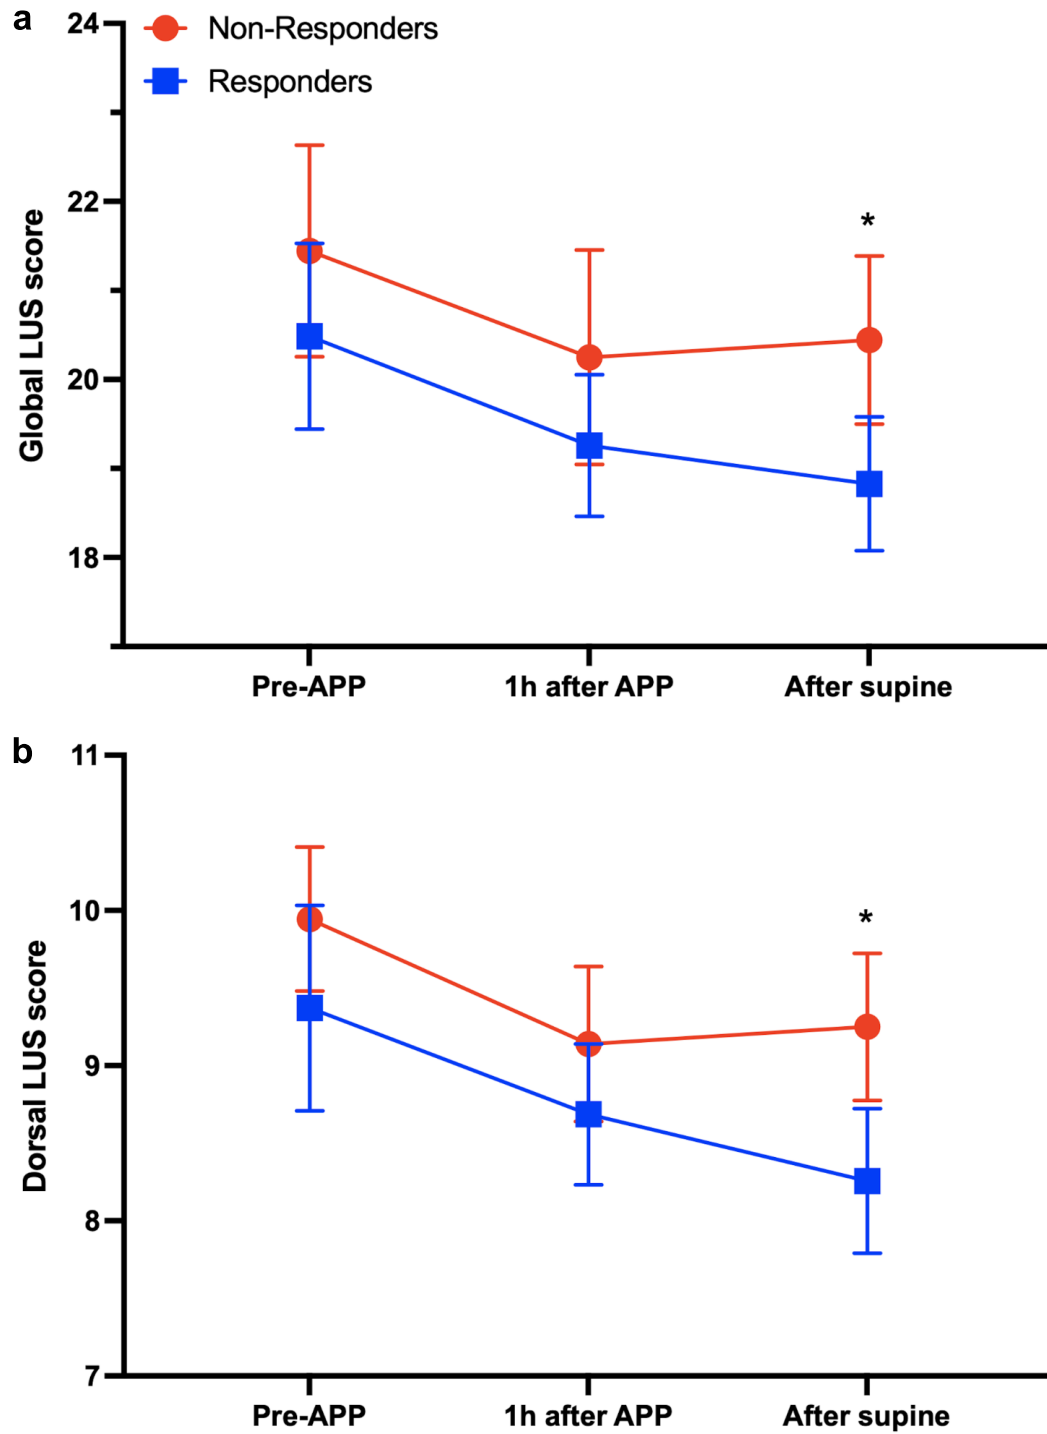

**Figure S3.** Correlation of mean daily duration of APP of the first 3 days with response in overall LUS score (a), respiratory rate (b) SpO<sub>2</sub>:FiO<sub>2</sub> ratio (c), and ROX index (d). Red and blue dots correspond to treatment failure and treatment success patients, respectively. LUS, lung ultrasound. APP, awake prone positioning.

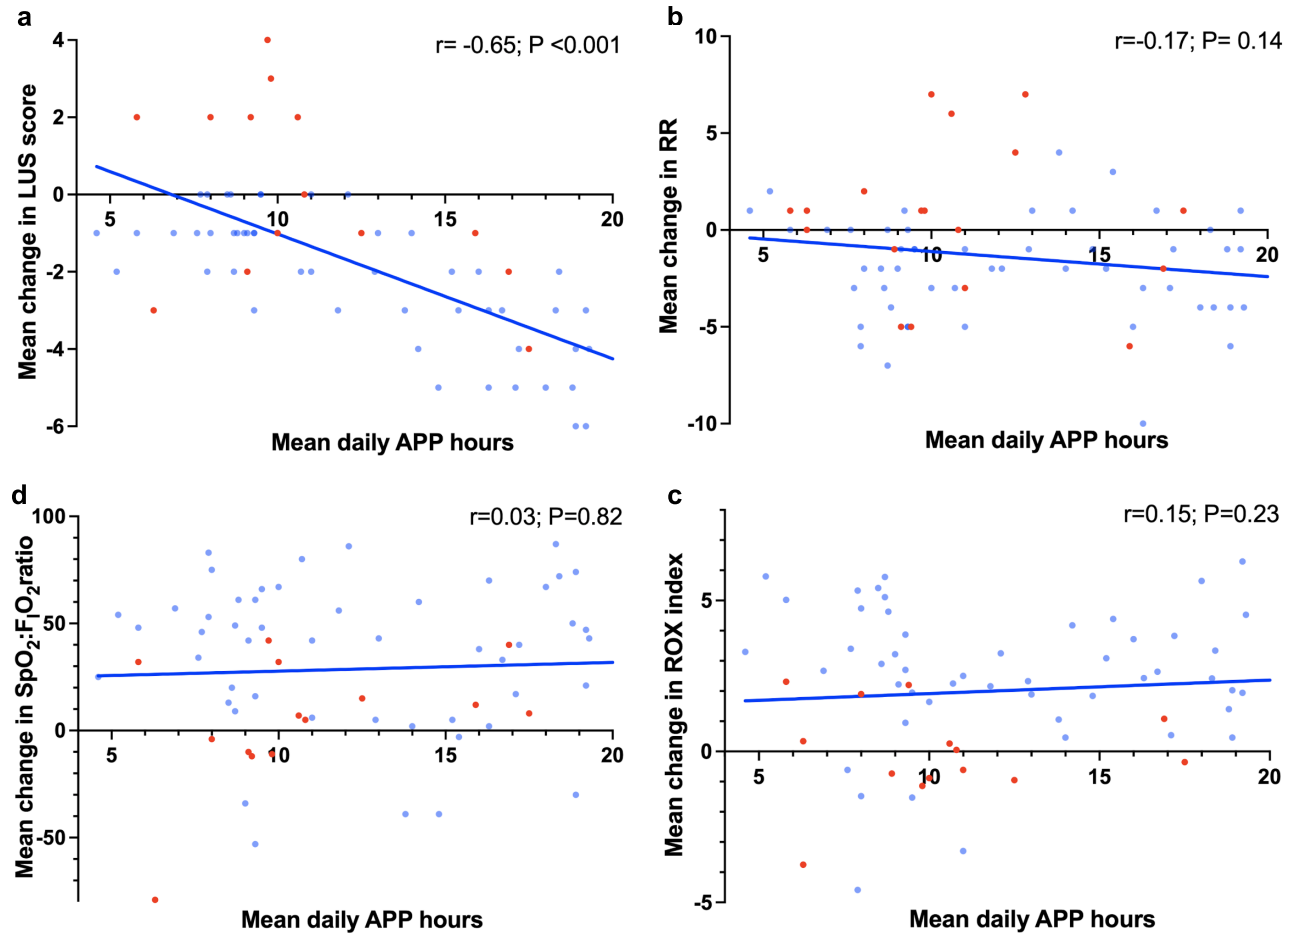

**Figure S4.** Mean daily duration of APP at 3 days and LUS score changes in dorsal and ventral lung zones. LUS, lung ultrasound; APP, awake prone positioning.

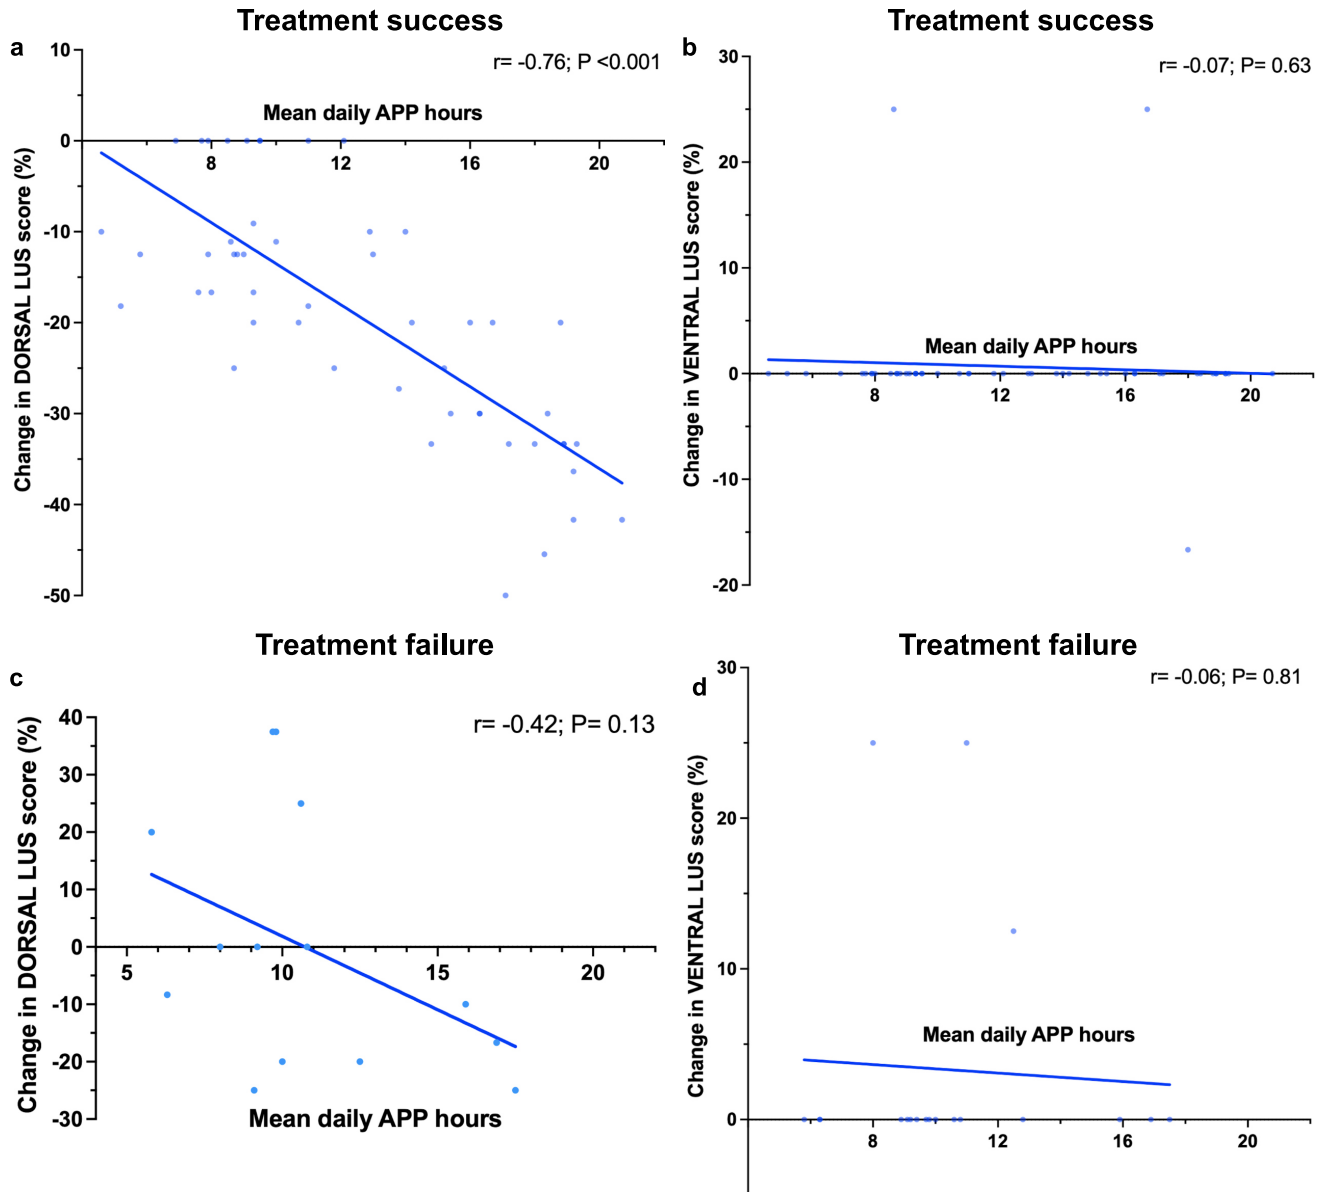

**Figure S5.** Responses in  $\text{SpO}_2:\text{FIO}_2$  ratio (**a, b, c**), ROX index (**d, e, f**), and respiratory rates at the first morning APP sessions of the 1<sup>st</sup>, 2<sup>nd</sup> and 3<sup>rd</sup> days.

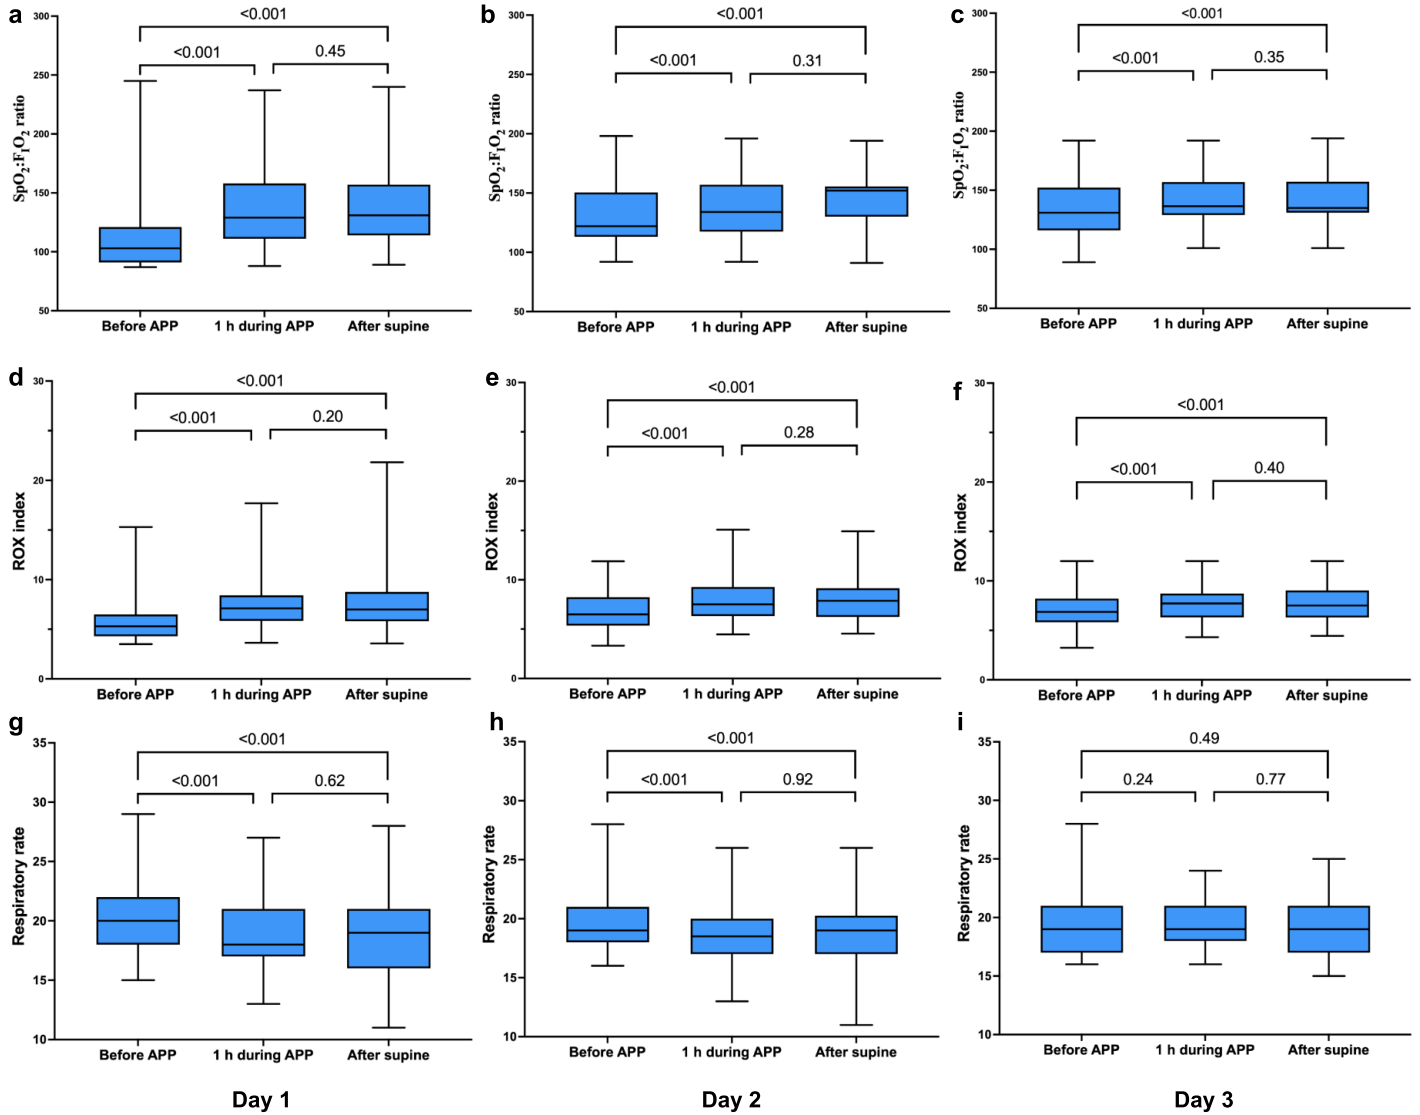

**Figure S6.** Correlation between response in LUS score with SpO<sub>2</sub>:F<sub>i</sub>O<sub>2</sub> ratio, ROX index and respiratory rate at the first morning APP sessions of the 1<sup>st</sup> (a, b, c), 2<sup>nd</sup> (d, e, f) and 3<sup>rd</sup> (g, h, i) days. LUS, lung ultrasound; APP, awake prone positioning; RR, respiratory rate

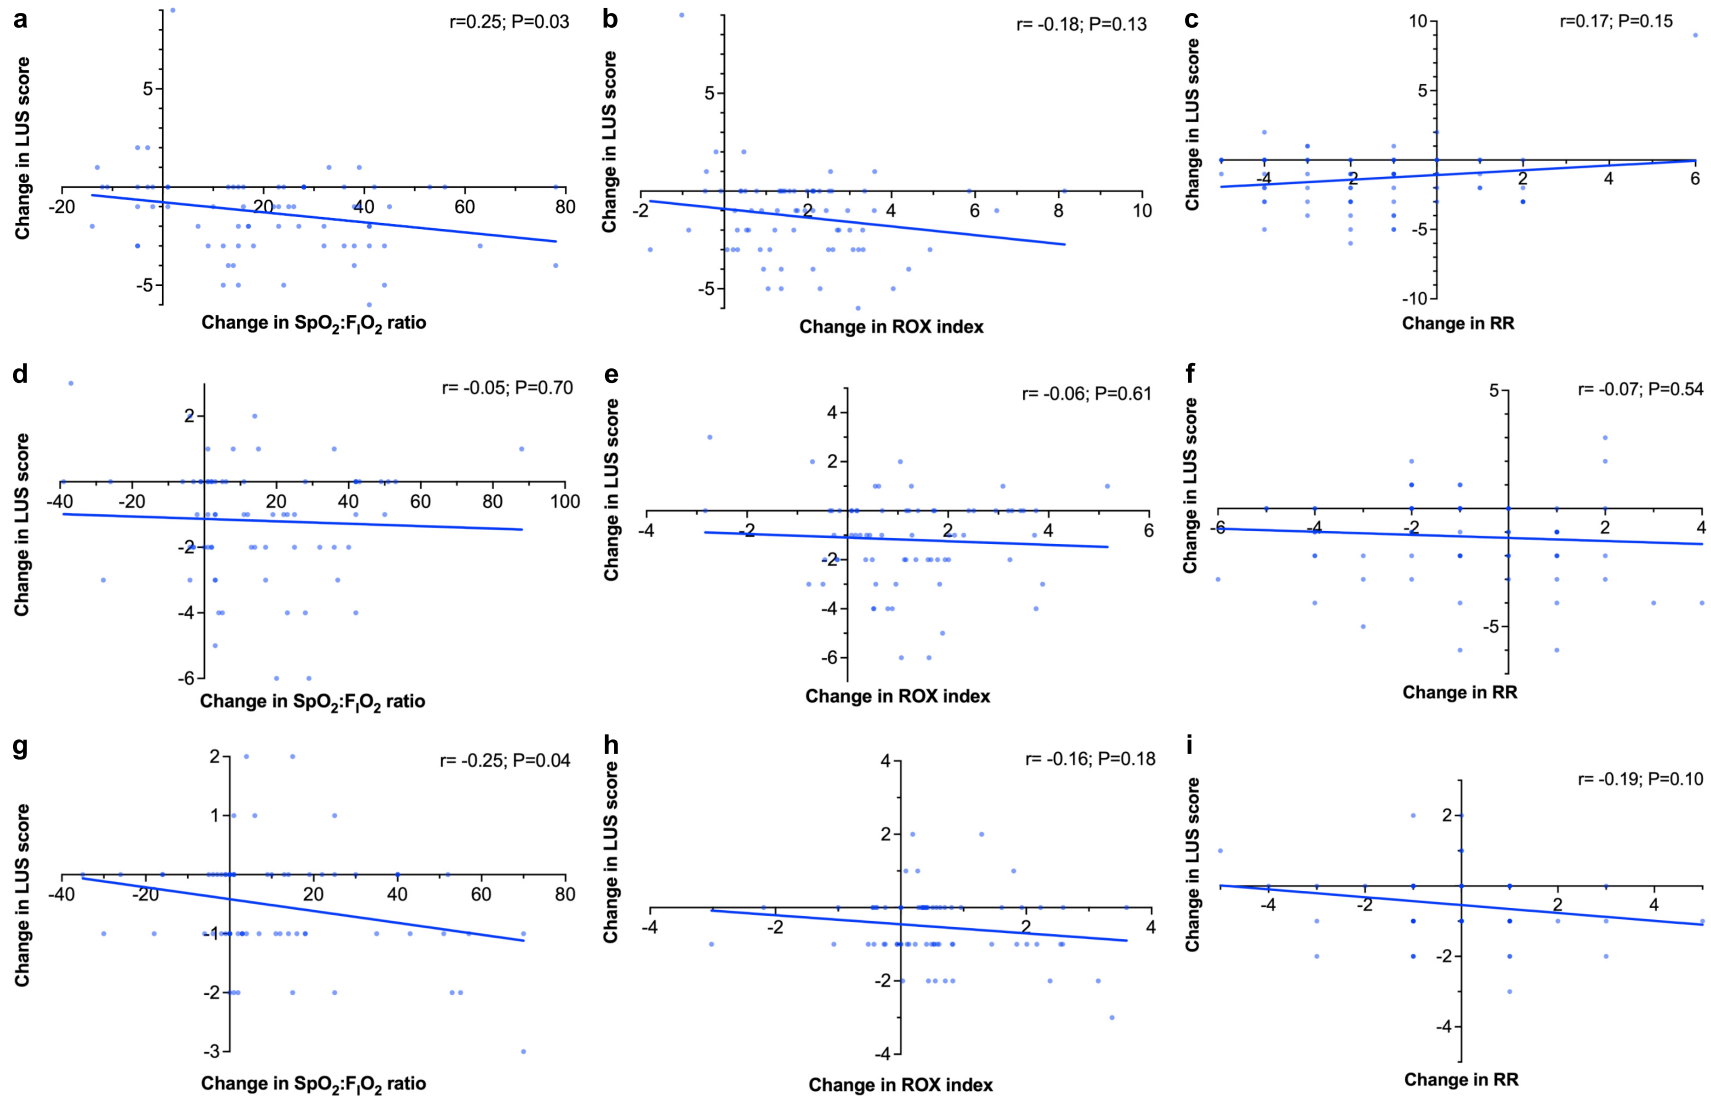



**Figure S7.** Comparison between areas under the ROC curves of responses to APP at the first session. ROC, receiver operating characteristic; APP, awake prone positioning.

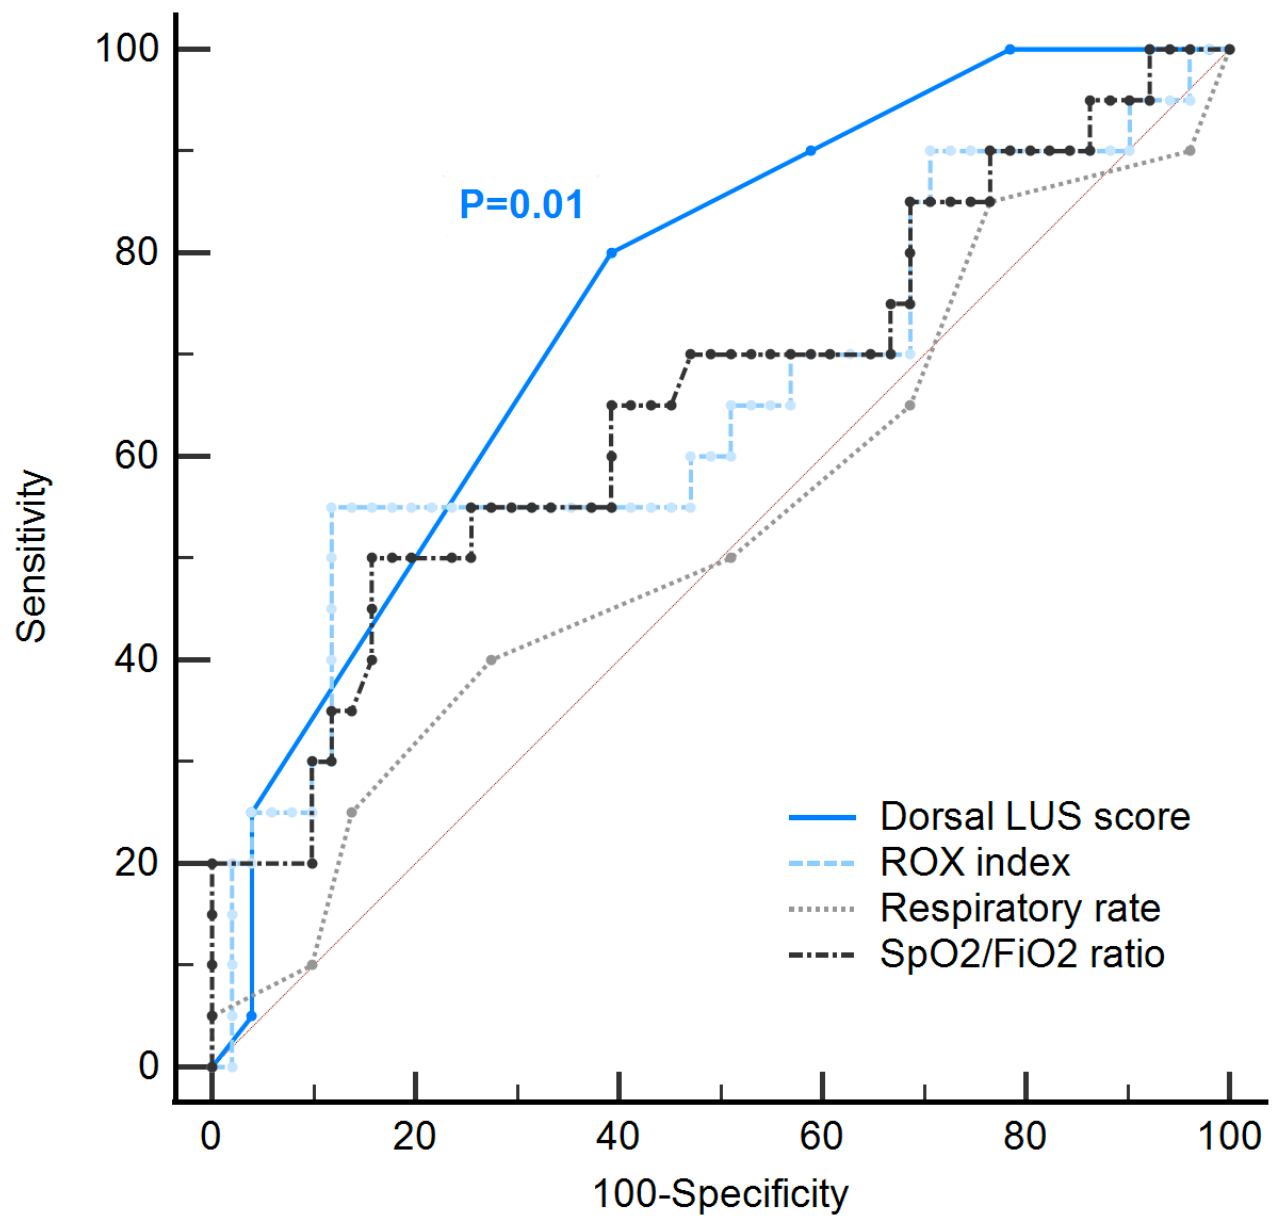

**Table S2.** Logistic regression to analyze the effect of  $\geq 1$  point decrease in dorsal LUS score at the first APP on the risk of intubation.

| Variable                                                                                         | Odds Ratio | 95%CI     | P value |
|--------------------------------------------------------------------------------------------------|------------|-----------|---------|
| Unadjusted $\Delta$ dorsal LUS score < -1 point after return to supine at the first APP *        | 0.16       | 0.04-0.55 | 0.003   |
| Adjusted by Age                                                                                  | 0.20       | 0.05-0.71 | 0.01    |
| Adjusted by days from COVID confirmation                                                         | 0.14       | 0.04-0.53 | 0.003   |
| Adjusted by pulmonary disease                                                                    | 0.16       | 0.04-0.59 | 0.005   |
| Adjusted by chronic kidney disease                                                               | 0.15       | 0.04-0.55 | 0.004   |
| Adjusted by hypertension                                                                         | 0.15       | 0.04-0.54 | 0.003   |
| Adjusted by baseline SpO <sub>2</sub> :F <sub>I</sub> O <sub>2</sub>                             | 0.16       | 0.04-0.55 | 0.003   |
| Adjusted by $\Delta$ -dorsal LUS score after 1h on APP                                           | 0.14       | 0.03-0.56 | 0.005   |
| Adjusted by $\Delta$ -SpO <sub>2</sub> :F <sub>I</sub> O <sub>2</sub> after 1h on APP (%)        | 0.16       | 0.04-0.58 | 0.004   |
| Adjusted by $\Delta$ -SpO <sub>2</sub> :F <sub>I</sub> O <sub>2</sub> after return to supine (%) | 0.19       | 0.05-0.68 | 0.01    |
| Adjusted by $\Delta$ -RR after 1h on APP                                                         | 0.16       | 0.04-0.57 | 0.04    |
| Adjusted by $\Delta$ -RR after return to supine                                                  | 0.16       | 0.04-0.55 | 0.003   |
| Adjusted by $\Delta$ -ROX after 1h on APP                                                        | 0.17       | 0.05-0.62 | 0.007   |
| Adjusted by $\Delta$ -ROX after return to supine                                                 | 0.16       | 0.04-0.59 | 0.005   |
| Adjusted by mean daily APP duration at first 3 days                                              | 0.19       | 0.04-0.78 | 0.02    |

\*All  $\Delta$ -values are referred to the first session at the first day of recruitment
